# Supplementary material for: Comparative Genome-Wide Screening Identifies a Conserved Doxorubicin Repair Network That Is Diploid Specific in Saccharomyces cerevisiae
Source: PLoS One. 2009 Jun 8;4(6):e5830. doi: 10.1371/journal.pone.0005830 (PMC2688081; doi:10.1371/journal.pone.0005830)
Supplement: Table S1 — Yeast diploid deletion mutants hypersensitive to the lethal effects of doxorubicin with associated sensitivity to the toxin zymocin. Doxorubicin hypersensitivity in the diploid deletion strains was scored from 1–3 (complete description in Results section of text) with 1 being the least sensitive and 3 the most sensitive. Sensitivity to zymocin in the diploid deletion strains was scored 1–3 with 1 being the least sensitive and 3 being the most sensitive (see complete description in Results section of text). Diploid deletions that are cross sensitive to ionizing radiation (IR) have been indicated in bold. References that describe haploid deletion strains that are sensitive to doxorubicin, are defective in G1 cell size control and cross sensitive to oxidative damaging agents are described in the text (see Results section for detailed description). Human orthologs and associated P-values were determined by protein BLAST analysis. Yeast protein sequences were obtained from SGD and BLAST analysis was used to identify orthologs within the human reference protein database at NCBI. Gene functions and cellular component of corresponding yeast proteins were obtained from SGD. (0.11 MB XLS) [file pone.0005830.s001.xls]

## Sheet: Sheet1
Gene deletion	ORF	DoxS (1n)	DoxS (2n)	ZymS	IRS	G1 size control	OxS	Function	Cellular Component	Ortholog	P-value
ACO1	YLR304C		2	3				ACOnitase: Aconitase, required for the tricarboxylic acid (TCA) cycle and also independently required for mitochondrial genome maintenance; phosphorylated; component of the mitochondrial nucleoid; mutation leads to glutamate auxotrophy	mitochondrion	ACO2	0
ADE12	YNL220W		2	no	IRS			ADEnine requiring: Adenylosuccinate synthase, catalyzes the first step in synthesis of adenosine monophosphate from inosine 5'monophosphate during purine nucleotide biosynthesis; exhibits binding to single-stranded autonomously replicating (ARS) core sequence	cytoplasm	ADSSL1	1e-144
ADH1 (x2)	YOL086C		2	2		lge		Alcohol DeHydrogenase: Alcohol dehydrogenase, fermentative isozyme active as homo- or heterotetramers; required for the reduction of acetaldehyde to ethanol, the last step in the glycolytic pathway	cytosol	ADH1B	1e-19
ADK1 (x2)	YDR226W	yes	3	3	IRS	lge		ADenylate Kinase: Adenylate kinase, required for purine metabolism; localized to the cytoplasm and the mitochondria; lacks cleavable signal sequence	mitochondrion, cytoplasm	AK2	3e-70
AKL1	YBR059C		1	no				Ark family Kinase-Like protein: Ser-Thr protein kinase, member (with Ark1p and Prk1p) of the Ark kinase family; involved in endocytosis and actin cytoskeleton organization	cytoplasm, bud neck	AAK1	7e-48
AKR1	YDR264C		3	2	IRS	lge		AnKyrin Repeat-containing protein: Palmitoyl transferase involved in protein palmitoylation; acts as a negative regulator of pheromone response pathway; required for endocytosis of pheromone receptors; involved in cell shape control; contains ankyrin repeat	membrane	ZDHHC17	1e-58
ANP1	YEL036C		2	2		lge		ANP and osmotic sensitive: Subunit of the alpha-1,6 mannosyltransferase complex; type II membrane protein; has a role in retention of glycosyltransferases in the Golgi; involved in osmotic sensitivity and resistance to aminonitrophenyl propanediol	golgi	TNRC6A	6e-06
ARP5	YNL059C		2	2	IRS	lge		Actin-Related Protein: Nuclear actin-related protein involved in chromatin remodeling, component of chromatin-remodeling enzyme complexes	nucleus	ACTR5	2e-41
ASC1	YMR116C	yes	2	no		lge		Absence of growth Suppressor of Cyp1: G-protein beta subunit and guanine nucleotide dissociation inhibitor for Gpa2p; ortholog of RACK1 that inhibits translation; core component of the small (40S) ribosomal subunit; represses Gcn4p in the absence of amino acid starvation	cytoplasm	GNB2L1	1e-95
ASF1	YJL115W	yes	2	3	IRS	lge	yes	Anti-Silencing Function: Nucleosome assembly factor, involved in chromatin assembly and disassembly, anti-silencing protein that causes derepression of silent loci when overexpressed; plays a role in regulating Ty1 transposition	nucleus	ASF1A	1e-50
BCK1	YJL095W		2	no	IRS	wee		Bypass of C Kinase: Mitogen-activated protein (MAP) kinase kinase kinase acting in the protein kinase C signaling pathway, which controls cell integrity; upon activation by Pkc1p phosphorylates downstream kinases Mkk1p and Mkk2p	cytoplasm	MAP3K3	2e-52
BEM1	YBR200W	yes	2	3	IRS	lge		Bud EMergence: Protein containing SH3-domains, involved in establishing cell polarity and morphogenesis; functions as a scaffold protein for complexes that include Cdc24p, Ste5p, Ste20p, and Rsr1p	bud, bud neck	SH3PXD2B	5e-09
BEM4	YPL161C	yes	3	3		lge		Bud EMergence: Protein involved in establishment of cell polarity and bud emergence; interacts with the Rho1p small GTP-binding protein and with the Rho-type GTPase Cdc42p; involved in maintenance of proper telomere length	cytoplasm, nucleus	none
BUD16 (x2)	YEL029C		3	2				BUD site selection: Putative pyridoxal kinase, key enzyme in vitamin B6 metabolism; involved in maintaining levels of pyridoxal 5'-phosphate, the active form of vitamin B6; required for genome integrity; homolog of E. coli PdxK; involved in bud-site selection	unknown	PDXK	1e-45
BUD19 (x2, OVLP)	YJL188C		1	no	IRS	wee	yes	ORF, Dubious: Dubious open reading frame, unlikely to encode a protein; not conserved in closely related Saccharomyces species; 88% of ORF overlaps the verified gene RPL39	unknown	none
BUD22 (x2)	YMR014W	yes	2	no		lge		BUD site selection: Protein involved in bud-site selection; diploid mutants display a random budding pattern instead of the wild-type bipolar pattern	nucleus	LOC100133599	1e-09
BUD23 (x2)	YCR047C		3	3			yes	BUD site selection: Protein involved in bud-site selection; diploid mutants display a random budding pattern instead of the wild-type bipolar pattern	cytoplasm, nucleus	WBSCR22	7e-66
BUD25	YER014C-A		3	3		wee		BUD site selection: Protein involved in bud-site selection; diploid mutants display a random budding pattern instead of the wild-type bipolar pattern	unknown	none
CBC2	YPL178W		3	no			yes	Cap Binding Complex: Small subunit of the heterodimeric cap binding complex that also contains Sto1p, component of the spliceosomal commitment complex; interacts with Npl3p, possibly to package mRNA for export from the nucleus; contains an RNA-binding motif	nucleus	NCBP2	6e-38
CCR4	YAL021C		2	3	IRS	lge	yes	Carbon Catabolite Repression: Component of the CCR4-NOT transcriptional complex, which is involved in regulation of gene expression; component of the major cytoplasmic deadenylase, which is involved in mRNA poly(A) tail shortening	cytoplasm, P-body	CNOT6	8e-83
CCW12	YLR110C		2	3				Covalently linked Cell Wall protein: Cell wall mannoprotein, mutants are defective in mating and agglutination, expression is downregulated by alpha-factor	cell wall	LOC100132635	7e-07
CKB1	YGL019W		2	no				Casein Kinase Beta subunit: Beta regulatory subunit of casein kinase 2, a Ser/Thr protein kinase with roles in cell growth and proliferation; the holoenzyme also contains CKA1, CKA2 and CKB2, the many substrates include transcription factors and all RNA polymerases	nucleus, cytoplasm	CSNK2B	9e-45
CKB2	YOR039W		1	no				Casein Kinase Beta' subunit: Beta' regulatory subunit of casein kinase 2, a Ser/Thr protein kinase with roles in cell growth and proliferation; the holoenzyme also contains CKA1, CKA2 and CKB1, the many substrates include transcription factors and all RNA polymerases	nucleus, cytoplasm	CSNK2B	1e-52
CLC1 (x2)	YGR167w		3	3	IRS			Clathrin Light Chain: Clathrin light chain, subunit of the major coat protein involved in intracellular protein transport and endocytosis; thought to regulate clathrin function; two Clathrin heavy chains (CHC1) form the clathrin triskelion structural component	golgi	CLTA	9e-05
CTF4	YPR135W		3	3	IRS			Chromosome Transmission Fidelity: Chromatin-associated protein, required for sister chromatid cohesion; interacts with DNA polymerase alpha (Pol1p) and may link DNA synthesis to sister chromatid cohesion	nucleus	WDHD1	5e-23
CTI6	YPL181W		3	no				Cyc8-Tup1 Interacting protein: Protein that relieves transcriptional repression by binding to the Cyc8p-Tup1p corepressor and recruiting the SAGA complex to the repressed promoter; contains a PHD finger domain	nucleus	CYLC1	9e-10
CTI6 (OVLP)	YPL182C		3	no				ORF, Dubious: partially overlaps CTI6	unknown	CYLC1	9e-10
CTK1 (x2)	YKL139W	No	3	no				Carboxy-Terminal domain Kinase: Catalytic (alpha) subunit of C-terminal domain kinase I (CTDK-I), which phosphorylates the C-terminal repeated domain of the RNA polymerase II large subunit (Rpo21p) to affect both transcription and pre-mRNA 3' end processing	nucleus	CRKRS	1e-73
CTK3 (x2)	YML112W		2	no		lge		Carboxy-Terminal domain Kinase: Gamma subunit of C-terminal domain kinase I (CTDK-I), which phosphorylates the C-terminal repeated domain of the RNA polymerase II large subunit (Rpo21p) to affect both transcription and pre-mRNA 3' end processing	nucleus, cytoplasm	none
CUP5	YEL027W		3	2				Copper UPtake: Proteolipid subunit of the vacuolar H(+)-ATPase V0 sector (subunit c; dicyclohexylcarbodiimide binding subunit); required for vacuolar acidification and important for copper and iron metal ion homeostasis	ER membrane	ATP6VOC	9e-56
DBF2	YGR092W		2	3	IRS	lge	yes	DumbBell Forming: Ser/Thr kinase involved in transcription and stress response; functions as part of a network of genes in exit from mitosis; localization is cell cycle regulated; activated by Cdc15p during the exit from mitosis	bud neck, spindle	STK38L	3e-66
DBP7 (x2)	YKR024C		1	no		lge	yes	Dead Box Protein: Putative ATP-dependent RNA helicase of the DEAD-box family involved in ribosomal biogenesis	nucleolus	DDX31	8e-81
DHH1 (x2)	YDL160C		1	3	IRS			DExD/H-box Helicase: Cytoplasmic DExD/H-box helicase, stimulates mRNA decapping, coordinates distinct steps in mRNA function and decay, interacts with both the decapping and deadenylase complexes, may have a role in mRNA export and translation	cytoplasm, P-body	DDX6	3e-162
DOA4	YDR069C		2	3				Degradation Of Alpha: Ubiquitin isopeptidase, required for recycling ubiquitin from proteasome-bound ubiquitinated intermediates, acts at the late endosome/prevacuolar compartment to recover ubiquitin from ubiquitinated membrane proteins en route to the vacuole	mitochondrion, proteasome, membrane	USP8	3e-51
DOC1	YGL240W		2	3	IRS			Destruction Of Cyclin B: Processivity factor required for the ubiquitination activity of the anaphase promoting complex (APC), mediates the activity of the APC by contributing to substrate recognition; involved in cyclin proteolysis	mitochondrion	ANAPC10	2e-22
ECM33	YBR078W		1	no		lge	yes	ExtraCellular Mutant: GPI-anchored protein of unknown function, has a possible role in apical bud growth; GPI-anchoring on the plasma membrane crucial to function; phosphorylated in mitochondria; similar to Sps2p and Pst1p	mitochondrion, cell wall, membrane	MUC21	9e-09
EDC3	YEL051W		3	no				Enhancer of mRNA DeCapping: Non-essential conserved protein of unknown function, plays a role in mRNA decapping by specifically affecting the function of the decapping enzyme Dcp1p; localizes to cytoplasmic mRNA processing bodies	cytoplasm, P-body	ATP6V1D	3e-61
EGD1	YPL037C		3	no				Enhancer of Gal4 DNA binding: Subunit beta1 of the nascent polypeptide-associated complex (NAC) involved in protein targeting, associated with cytoplasmic ribosomes; enhances DNA binding of the Gal4p activator; homolog of human BTF3b	cytosolic ribosome	BTF3L4	3e-22
ERG4	YGL012W		3	2			yes	ERGosterol biosynthesis: C-24(28) sterol reductase, catalyzes the final step in ergosterol biosynthesis; mutants are viable, but lack ergosterol	ER	LBR	1e-55
ERG6	YML008C		3	2				ERGosterol biosynthesis: Delta(24)-sterol C-methyltransferase, converts zymosterol to fecosterol in the ergosterol biosynthetic pathway by methylating position C-24; localized to both lipid particles and mitochondrial outer membrane	mitochondrion, ER	TGS1	3e-05
ERV41	YML067C		3	no				ER Vesicle: Protein localized to COPII-coated vesicles, forms a complex with Erv46p; involved in the membrane fusion stage of transport; has homology to human ERGIC2 (PTX1) protein	ER, Golgi membrane	ERGIC2	7e-27
FUN12 (x2)	YAL035W		2	no	IRS	lge		Function Unknown Now: GTPase, required for general translation initiation by promoting Met-tRNAiMet binding to ribosomes and ribosomal subunit joining; homolog of bacterial IF	mitochondrion, cytosolic small ribosome subunit	EIF5B	0
FYV5	YCL058C		2	no		wee		Function required for Yeast Viability: Protein of unknown function, required for survival upon exposure to K1 killer toxin; involved in ion homeostasis	unknown	none
GAL11 (x2)	YOL051W		3	3		lge		GALactose metabolism:Subunit of the RNA polymerase II mediator complex; associates with core polymerase subunits to form the RNA polymerase II holoenzyme; affects transcription by acting as target of activators and repressors	mediator complex	MLL2	3e-16
GAL11 (OVLP)	YOL050C		3	3				ORF, Dubious: partially overlaps GAL11	unknown	none
GAS1	YMR307W	yes	2	3				Glycophospholipid-Anchored Surface protein: Beta-1,3-glucanosyltransferase, required for cell wall assembly; localizes to the cell surface via a glycosylphosphatidylinositol (GPI) anchor	cell wall, plasma membrane	MUC21	3e-07
GCR2	YNL199C		2	no			yes	GlyColysis Regulatory protein: Transcriptional activator of genes involved in glycolysis; interacts and functions with the DNA-binding protein Gcr1p	nucleus	MUC21	2e-08
GET1	YGL020C		2	no				Golgi to ER Traffic: Subunit of the GET complex; required for the retrieval of HDEL proteins from the Golgi to the ER in an ERD2 dependent fashion and for normal mitochondrial morphology and inheritanc	ER, mitochondria	none
GON7 (x2)	YJL184W		2	no	IRS			Protein proposed to be involved in the modification of N-linked oligosaccharides, osmotic stress response, telomere uncapping and elongation, transcription; component of the EKC/KEOPS protein complex with Kae1p, Cgi121p, Pcc1p, and Bud32p	nuclear chromatin	none
GRR1	YJR090C		2	3	IRS			Glucose Repression-Resistant: F-box protein component of the SCF ubiquitin-ligase complex; involved in carbon catabolite repression, glucose-dependent divalent cation transport, high-affinity glucose transport, morphogenesis, and sulfite detoxification	bud neck, cytoplasm, nucleus	FBXL20	4e-26
GUP1	YGL084C		3	2	IRS			Glycerol UPtake: Plasma membrane protein involved in remodeling GPI anchors; member of the MBOAT family of putative membrane-bound O-acyltransferases; proposed to be involved in glycerol transport	ER, plasma membrane	HHATL	6e-14
HAL5	YJL165C		2	no			yes	HALotolerance: Putative protein kinase; overexpression increases sodium and lithium tolerance, whereas gene disruption increases cation and low pH sensitivity and impairs potassium uptake, suggesting a role in regulation of Trk1p and/or Trk2p transporters	unknown	PRKAA1	2e-21
HEM14	YER014W		3	no				HEMe biosynthesis: Protoporphyrinogen oxidase, a mitochondrial enzyme that catalyzes the seventh step in the heme biosynthetic pathway, converting protoporphyrinogen IX to protoporphyrin IX	mitochondrion	PPOX	1e-24
HEX3 (SLX5)	YDL013W		2	1				Synthetic Lethal of unknown [X] function: Subunit of the Slx5-Slx8 substrate-specific ubiquitin ligase complex; stimulated by prior attachment of SUMO to the substrate	ubiquitin ligase complex	HRNR	0.002
HFI1 (x2)	YPL254W	yes	3	3	IRS	lge	yes	Histone H2A Functional Interactor: Adaptor protein required for structural integrity of the SAGA complex, a histone acetyltransferase-coactivator complex that is involved in global regulation of gene expression through acetylation and transcription functions	SAGA complex	none
HHF1	YBR009C		1	no				Histone H Four: One of two identical histone H4 proteins (see also HHF2); core histone required for chromatin assembly and chromosome function; contributes to telomeric silencing; N-terminal domain involved in maintaining genomic integrity	nuclear nucleosome	HIST1H4A	2e-49
HIT1 (x2)	YJR055W		2	no		lge		HIgh Temperature growth: Protein of unknown function, required for growth at high temperature	cytoplasm, nucleus	none
HOM2	YDR158W		2	2				HOMoserine requiring: Aspartic beta semi-aldehyde dehydrogenase, catalyzes the second step in the common pathway for methionine and threonine biosynthesis; expression regulated by Gcn4p and the general control of amino acid synthesis	cytoplasm, nucleus	none
HOM3	YER052C		2	2				HOMoserine requiring: Aspartate kinase (L-aspartate 4-P-transferase); cytoplasmic enzyme that catalyzes the first step in the common pathway for methionine and threonine biosynthesis; expression regulated by Gcn4p and the general control of amino acid synthesis	cytoplasm	none
HPR1	YDR138W		3	no	IRS	lge		HyPerRecombination: Subunit of THO/TREX complexes that couple transcription elongation with mitotic recombination and with mRNA metabolism and export, subunit of an RNA Pol II complex; regulates lifespan; involved in telomere maintenance; similar to Top1p	nuclear export	WDR87	2e-07
HRR25 (OVLP)	YPL205C		3	3*				ORF, Dubious: partially overlaps HRR25;	unknown	none
HTZ1	YOL012C	yes	3	2				Histone Two A Z1: Histone variant H2AZ, exchanged for histone H2A in nucleosomes by the SWR1 complex; involved in transcriptional regulation through prevention of the spread of silent heterochromatin	nuclear chromatin	H2AFV	3e-40
IES6	YEL044W		2	2		lge		Ino Eighty Subunit: Protein that associates with the INO80 chromatin remodeling complex under low-salt condition	nucleus	C18orf37	3e-07
IFM1	YOL023W		3	2		wee	yes	Initiation Factor Mitochondrion: Mitochondrial translation initiation factor 2	mitochondrion	MTIF2	1e-102
IMP2'	YIL154C		3	2		lge	yes	Transcriptional activator involved in maintenance of ion homeostasis and protection against DNA damage caused by bleomycin and other oxidants, contains a C-terminal leucine-rich repeat	cytoplasm	SFRS12	0.004
KCS1	YDR017C		3	no			yes	pKC1 Suppressor: Inositol hexakisphosphate (IP6) and inositol heptakisphosphate (IP7) kinase; generation of high energy inositol pyrophosphates by Kcs1p is required for many processes such as vacuolar biogenesis, stress response and telomere maintenance	cytoplasm	IHPK3	3e-24
KHA1	YJL094C		2	2				K+/H+ Antiporter: Putative K+/H+ antiporter with a probable role in intracellular cation homeostasis, localized to Golgi vesicles and detected in highly purified mitochondria in high-throughput studies	mitochondrion, golgi	TMCO3	8e-06
KRE6	YPR159W		3	no		lge		Killer toxin REsistant: Protein required for beta-1,6 glucan biosynthesis; putative beta-glucan synthase; appears functionally redundant with Skn1p	golgi, ER, membrane	DSPP	1e-05
LGE1	YPL055C		3	no	IRS	lge		LarGE cells: Protein of unknown function; null mutant forms abnormally large cells, and homozygous diploid null mutant displays delayed premeiotic DNA synthesis and reduced efficiency of meiotic nuclear division	nucleus	FLG	8e-06
LSM1	YJL124C		2	no			yes	Like Sm: Lsm (Like Sm) protein; forms heteroheptameric complex (with Lsm2p, Lsm3p, Lsm4p, Lsm5p, Lsm6p, and Lsm7p) involved in degradation of cytoplasmic mRNAs	cytoplasm, P-body	LSM1	7e-20
LSM7	YNL147W		2	no	IRS			Like Sm:Lsm (Like Sm) protein; part of heteroheptameric complexes (Lsm2p-7p and either Lsm1p or 8p): cytoplasmic Lsm1p complex involved in mRNA decay; nuclear Lsm8p complex part of U6 snRNP and possibly involved in processing tRNA, snoRNA, and rRNA	cytoplasm, P-body, nucleolus	LSM7	4e-18
LST4	YKL176C		1	3			yes	Lethal with Sec Thirteen: Protein possibly involved in a post-Golgi secretory pathway; required for the transport of nitrogen-regulated amino acid permease Gap1p from the Golgi to the cell surface	golgi	LOC100133790	0.001
MDM20	YOL076W		3	3	IRS	lge		Mitochondrial Distribution and Morphology: Non-catalytic subunit of the NatB N-terminal acetyltransferase, which catalyzes N-acetylation of proteins with specific N-terminal sequences; involved in mitochondrial inheritance and actin assembly	mitochondrion inheritance	C12orf30	5e-13
MDM35 (x2)	YKL053C-A		2	no				Mitochondrial Distribution and Morphology:Mitochondrial intermembrane space cysteine motif protein; mutation affects mitochondrial distribution and morphology	mitochondrion, cytoplasm, nucleus	TRIAP1	2e-08
MET7	YOR241W		3	no		lge		METhionine requiring:Folylpolyglutamate synthetase, catalyzes extension of the glutamate chains of the folate coenzymes, required for methionine synthesis and for maintenance of mitochondrial DNA	cytoplasm, mitochondrion	FPGS	2e-82
MIP1	YOR330C		3	2		wee		MItochondrial DNA Polymerase: Catalytic subunit of the mitochondrial DNA polymerase; conserved C-terminal segment is required for the maintenance of mitochondrial genome	mitochondrion	POLG	1e-111
MMS1	YPR164W		3	no				Methyl MethaneSulfonate sensitivity: Protein likely involved in protection against replication-dependent DNA damage; mutants are sensitive to methyl methanesulfonate (MMS); implicated in regulation of Ty1 transposition	unknown	none
MMS22	YLR320W		2	3	IRS	lge	yes	Methyl MethaneSulfonate sensitivity: Protein that acts with Mms1p in a repair pathway that may be involved in resolving replication intermediates or preventing the damage caused by blocked replication forks; required for accurate meiotic chromosome segregation	nucleus	ANKRD12	0.0003
MMS4 (x2)	YBR098W		2	no	IRS			Methyl MethaneSulfonate sensitivity: Subunit of the structure-specific Mms4p-Mus81p endonuclease that cleaves branched DNA; involved in recombination and DNA repair	nucleus	none
MNN10	YDR245W		2	2		lge		MaNNosyltransferase: Subunit of Golgi mannosyltransferase complex also containing Anp1p, Mnn10p, Mnn11p, and Hoc1p that mediates elongation of the polysaccharide mannan backbone; forms a separate complex with Van1p that is also involved in backbone elongation	cell wall	none
MNN9 (x2)	YPL050C		3	3		wee		MaNNosyltransferase: Subunit of Golgi mannosyltransferase complex also containing Anp1p, Mnn10p, Mnn11p, and Hoc1p that mediates elongation of the polysaccharide mannan backbone; forms a separate complex with Van1p that is also involved in backbone elongation	golgi, membrane	none
MSD1	YPL104W		3	3		wee		Mitochondrial aminoacyl-tRNA Synthetase, Aspartate (D): Mitochondrial aspartyl-tRNA synthetase, required for acylation of aspartyl-tRNA; yeast and bacterial aspartyl-, asparaginyl-, and lysyl-tRNA synthetases contain regions with high sequence similarity, suggesting a common ancestral gene	mitochondrion	DARS2	4e-82
MSE1	YOL033W		3	2		wee	yes	Mitochondrial aminoacyl-tRNA Synthetase, Glutamate (E): Mitochondrial glutamyl-tRNA synthetase, encoded by a nuclear gene	mitochondrion	EARS2	4e-77
MSM1	YGR171C		2	2		wee	yes	Mitochondrial aminoacyl-tRNA Synthetase, Methionine: Mitochondrial methionyl-tRNA synthetase (MetRS), functions as a monomer in mitochondrial protein synthesis; functions similarly to cytoplasmic MetRS although the cytoplasmic form contains a zinc-binding domain not found in Msm1p	mitochondrion	MARS2	2e-84
MSN5	YDR335W		3	no		lge	yes	Multicopy suppressor of SNF1 mutation: Karyopherin involved in nuclear import and export; shown to be responsible for nuclear import of replication protein A and for export of several proteins including Swi6p, Far1p, and Pho4p; cargo dissociation involves binding to RanGTP	nucleus	XPO5	6e-20
MSY1	YPL097W		3	3				Mitochondrial aminoacyl-tRNA Synthetase, tyrosine (Y): Mitochondrial tyrosyl-tRNA synthetase	mitochondrion	YARS2	7e-68
MTQ2 (x2)	YDR140W		3	no				S-adenosylmethionine-dependent methyltransferase of the seven beta-strand family; methylates release factor eRF1 (Sup45p) in vitro; is not an essential gene; similar to E.coli PrmC	cytoplasm, nucleus	N6AMT1	6e-24
NAB6	YML117W		2	1				Nucleic Acid Binding protein: Putative RNA-binding protein, based on computational analysis of large-scale protein-protein interaction data	cytoplasm	none
NEW1	YPL226W	yes	3	no				ATP binding cassette family member; Asn/Gln-rich rich region supports [NU+] prion formation, susceptibility to [PSI+] prion induction and aggregation of a fragment of the human Machado-Joseph Disease protein	cytoplasm, mitochondrion	GCN20	2e-45
NFI1	YOR156C		3	no				SUMO ligase, catalyzes the covalent attachment of SUMO (Smt3p) to proteins; involved in maintenance of proper telomere length	cytoplasm, nucleus	PIAS4	1e-28
NOT5 (x2)	YPR072W		3	3	IRS			Subunit of the CCR4-NOT complex, which is a global transcriptional regulator with roles in transcription initiation and elongation and in mRNA degradation	cytoplasm	CNOT3	2e-43
NPL3	YDR432W		2	no		lge		Nuclear Protein Localization: RNA-binding protein that carries poly(A)+ mRNA from the nucleus into the cytoplasm; dissociation from mRNAs is promoted by Mtr10p; phosphorylated by Sky1p in the cytoplasm	cytoplasm, nucleus	HNRNPR	6e-20
NPL3 (OVLP)	YDR433W		2	no	IRS			ORF, Dubious: partially overlaps NPL3	unknown	none
NSR1	YGR159C		2	no			yes	Nucleolar protein that binds nuclear localization sequences, required for pre-rRNA processing and ribosome biogenesis	mitochondrion, nucleus, nucleolus	NCL	7e-34
NSR1 (OVLP)	YGR160W		2	no				ORF, Dubious: partially overlaps NSR1	unknown	LOC645490	0.0003
NUP133	YKR082W		2	no	IRS			NUclear Pore: Subunit of the Nup84p subcomplex of the nuclear pore complex (NPC), localizes to both sides of the NPC, required to establish a normal nucleocytoplasmic concentration gradient of the GTPase Gsp1p	nuclear pore	none
OCH1 (x2)	YGL038C		3	3	IRS			Outer CHain elongation: Mannosyltransferase of the cis-Golgi apparatus, initiates the polymannose outer chain elongation of N-linked oligosaccharides of glycoproteins	golgi	none
ORF	YOR152C		3	no				ORF, Uncharacterized	membrane	ANKRD26	2e-05
ORF	YDR049W		2	no				ORF, Uncharacterized: Zinc finger protein; putative transcription factor that may interact with proteins involved in histone acetylation or deacetylation; may be involved in altering acetylation on histone lysines	cytoplasm, mitochondrion	ANKZF1	5e-29
ORF (x2, MTC7)	YEL033W		2	2	IRS		yes	Maintenance of Telomere Capping: Predicted metabolic role based on network analysis derived from ChIP experiments, a large-scale deletion study and localization of transcription factor binding sites; null mutant is sensitive to temperature oscillation in a cdc13-1 mutant	unknown	none
ORF (SPT20)	YOL148C		1	no				SuPpressor of Ty: Subunit of the SAGA transcriptional regulatory complex, involved in maintaining the integrity of the complex	nucleus	none
ORF	YPL260W		3	no				ORF, Uncharacterized: Putative substrate of cAMP-dependent protein kinase (PKA); green fluorescent protein (GFP)-fusion protein localizes to the cytoplasm and nucleus; YPL260W is not an essential gene	cytoplasm, nucleus	none
ORF (OVLP)	YPL261C		3	no				ORF, Dubious: partially overlaps YPL260W	unknown	none
PAT1	YCR077C		3	no	IRS	lge	yes	Protein Associated with Topoisomerase II: Topoisomerase II-associated deadenylation-dependent mRNA-decapping factor; also required for faithful chromosome transmission, maintenance of rDNA locus stability, and protection of mRNA 3'-UTRs from trimming; functionally linked to Pab1p	cytoplasm, P-body, cytosolic small ribosome subunit	PATL1	1e-09
PDR1	YGL013C		2	no			yes	Pleiotropic Drug Resistance: Zinc cluster protein that is a master regulator involved in recruiting other zinc cluster proteins to pleiotropic drug response elements (PDREs) to fine tune the regulation of multidrug resistance genes	nucleus	none
PEP3 (x2)	YLR148W		2	3		wee	yes	carboxyPEPtidase Y-deficient: Component of CORVET tethering complex; vacuolar peripheral membrane protein that promotes vesicular docking/fusion reactions in conjunction with SNARE proteins, required for vacuolar biogenesis	vacuole membrane	VPS18	1e-44
PER1 (x2)	YCR044C		3	3				protein Processing in the ER: Protein of the endoplasmic reticulum, required for GPI-phospholipase A2 activity that remodels the GPI anchor as a prerequisite for association of GPI-anchored proteins with lipid rafts; functionally complemented by human ortholog PERLD1	ER, vacuolar membrane	PERLD1	6e-30
PFK26	YIL107C		1	2			yes	6-PhosphoFructo-2-Kinase: 6-phosphofructo-2-kinase, inhibited by phosphoenolpyruvate and sn-glycerol 3-phosphate, has negligible fructose-2,6-bisphosphatase activity, transcriptional regulation involves protein kinase A	cytoplasm	PFKFB3	3e-81
PGD1	YGL025C		3	2			yes	PolyGlutamine Domain: Subunit of the RNA polymerase II mediator complex; associates with core polymerase subunits to form the RNA polymerase II holoenzyme; essential for basal and activated transcription; direct target of Cyc8p-Tup1p transcriptional corepressor	nucleus	MUC7	8e-06
PHO2	YDL106C		2	3			yes	PHOsphate metabolism: Homeobox transcription factor; regulatory targets include genes involved in phosphate metabolism; binds cooperatively with Pho4p to the PHO5 promoter; phosphorylation of Pho2p facilitates interaction with Pho4p	nucleus	PITX1	6e-09
PHO85	YPL031C		3	2		wee	yes	PHOsphate metabolism: Cyclin-dependent kinase, with ten cyclin partners; involved in regulating the cellular response to nutrient levels and environmental conditions and progression through the cell cycle	nucleus	CDK2	1e-91
PIN4	YBL051C		3	1		lge		Psi+ INducibility: Protein involved in G2/M phase progression and response to DNA damage, interacts with Rad53p; contains an RNA recognition motif, a nuclear localization signal, and several SQ/TQ cluster domains; hyperphosphorylated in response to DNA damage	cytoplasm	MLL5	1e-05
PKR1	YMR123W		2	2			yes	Pichia farinosa Killer toxin Resistance: V-ATPase assembly factor, functions with other V-ATPase assembly factors in the ER to efficiently assemble the V-ATPase membrane sector (V0); overproduction confers resistance to Pichia farinosa killer toxin	ER membrane	none
PLC1	YPL268W		3	no	IRS	lge		PhosphoLipase C: Phospholipase C, hydrolyzes phosphatidylinositol 4,5-biphosphate (PIP2) to generate the signaling molecules inositol 1,4,5-triphosphate (IP3) and 1,2-diacylglycerol (DAG); involved in regulating many cellular processes	nucleus, chromosome pericentric region	PLCD4	2e-70
POP2	YNR052C		2	3	IRS	lge	yes	PGK promoter directed OverProduction: RNase of the DEDD superfamily, subunit of the Ccr4-Not complex that mediates 3' to 5' mRNA deadenylation	cytoplasm, P-body	CNOT8	1e-50
PRO1	YDR300C		1	no		lge		PROline requiring: Gamma-glutamyl kinase, catalyzes the first step in proline biosynthesis	cytoplasm	ALDH18A1	4e-23
PSK2	YOL045W		3	no				Pas domain-containing Serine/threonine protein Kinase: One of two (see also PSK1) PAS domain containing S/T protein kinases; regulates sugar flux and translation in response to an unknown metabolite by phosphorylating Ugp1p and Gsy2p (sugar flux) and Caf20p, Tif11p and Sro9p (translation)	cytoplasm, mitochondrion	PASK	3e-47
PSK2 (OVLP)	YOL046C		3	no				ORF, Dubious: partially overlaps PSK2	unknown	none
PTC1	YDL006W	yes	2	3				Phosphatase type Two C: Type 2C protein phosphatase (PP2C); inactivates the osmosensing MAPK cascade by dephosphorylating Hog1p; mutation delays mitochondrial inheritance; deletion reveals defects in precursor tRNA splicing, sporulation and cell separation	cytoplasm, nucleus	PPM1B	1e-32
PUS1	YPL212C		3	no				PseudoUridine Synthase: tRNA:pseudouridine synthase, introduces pseudouridines at positions 26-28, 34-36, 65, and 67 of tRNA; nuclear protein that appears to be involved in tRNA export; also acts on U2 snRNA	nucleus	PUS1	2e-28
PUS7	YOR243C		3	no				PseudoUridine Synthase: Pseudouridine synthase, catalyzes pseudouridylation at position 35 in U2 snRNA, position 13 in cytoplasmic tRNAs, and position 35 in pre-tRNA(Tyr); Asp(256) mutation abolishes activity; conserved in archaea, some bacteria, and vertebrates	nucleus	PUS7	3e-97
RAD50	YNL250W	yes	2	2	IRS	lge	yes	RADiation sensitive: Subunit of MRX complex, with Mre11p and Xrs2p, involved in processing double-strand DNA breaks in vegetative cells, initiation of meiotic DSBs, telomere maintenance, and nonhomologous end joining	nucleus, mitochondrion	RAD50	4e-158
RAD51	YER095W	yes	2	2	IRS			RADiation sensitive: Strand exchange protein, forms a helical filament with DNA that searches for homology; involved in the recombinational repair of double-strand breaks in DNA during vegetative growth and meiosis; homolog of Dmc1p and bacterial RecA protein	nucleus	RAD51	2e-130
RAD52	YML032C	yes	3	1	IRS			RADiation sensitive: Protein that stimulates strand exchange by facilitating Rad51p binding to single-stranded DNA; anneals complementary single-stranded DNA; involved in the repair of double-strand breaks in DNA during vegetative growth and meiosis	nucleus	RAD52	2e-40
RAD54	YGL163C		2	2	IRS			RADiation sensitive: DNA-dependent ATPase, stimulates strand exchange by modifying the topology of double-stranded DNA; involved in the recombinational repair of double-strand breaks in DNA during vegetative growth and meiosis; member of the SWI/SNF family	nucleus	RAD54L	2e-168
RAD55	YDR076W	yes	3	no	IRS			RADiation sensitive: Protein that stimulates strand exchange by stabilizing the binding of Rad51p to single-stranded DNA; involved in the recombinational repair of double-strand breaks in DNA during vegetative growth and meiosis; forms heterodimer with Rad57p	nucleus	RAD51L3	1e-05
RAD57	YDR004W	yes	3	no	IRS			RADiation sensitive: Protein that stimulates strand exchange by stabilizing the binding of Rad51p to single-stranded DNA; involved in the recombinational repair of double-strand breaks in DNA during vegetative growth and meiosis; forms heterodimer with Rad55p	nucleus	RAD51L1	5e-19
RAD59	YDL059C		2	no	IRS			RADiation sensitive: Protein involved in the repair of double-strand breaks in DNA during vegetative growth via recombination and single-strand annealing; anneals complementary single-stranded DNA; homologous to Rad52p	nucleus	RAD52	2e-08
RDS2	YPL133C		2	no				Regulator of Drug Sensitivity: Zinc cluster transcriptional activator involved in conferring resistance to ketoconazole	cytoplasm, nucleus	FAM135A	2e-05
REG1	YDR028C		3	1			yes	REsistance to Glucose repression: Regulatory subunit of type 1 protein phosphatase Glc7p, involved in negative regulation of glucose-repressible gene	cytoplasm	DSPP	8e-30
RIS1 (ULS1)	YOR191W		3	no				Ubiquitin Ligase for SUMO conjugates: RING finger protein involved in proteolytic control of sumoylated substrates; interacts with SUMO (Smt3p); member of the SWI/SNF family of DNA-dependent ATPases; plays a role in antagonizing silencing during mating-type switching	nucleus, mitochondrion	HLTF	1e-61
RLR1 (THO2)	YNL139C		3	no	IRS	lge		suppressor of the Transcriptional defect of Hpr1 by Overexpression: Subunit of the THO complex, which is required for efficient transcription elongation and involved in transcriptional elongation-associated recombination; required for LacZ RNA expression from certain plasmids	nuclear export	THOC2	7.00-E47
RLR1 (OVLP)	YNL140C		2	no				ORF, Dubious: partially overlaps RLR1 (THO2)	unknown	none
RNR1	YER070W		2	3		lge		RiboNucleotide Reductase: One of two large regulatory subunits of ribonucleotide-diphosphate reductase; the RNR complex catalyzes rate-limiting step in dNTP synthesis, regulated by DNA replication and DNA damage checkpoint pathways via localization of small subunits	cytoplasm	RRM1	0
RNR4	YGR180C		1	3		lge	yes	RiboNucleotide Reductase: Ribonucleotide-diphosphate reductase (RNR), small subunit; the RNR complex catalyzes the rate-limiting step in dNTP synthesis and is regulated by DNA replication and DNA damage checkpoint pathways via localization of the small subunits	cytoplasm, nucleus	RRM2	1e-86
ROX3	YBL093C		2	3		lge	yes	Repressor Of hypoXic genes: Subunit of the RNA polymerase II mediator complex; associates with core polymerase subunits to form the RNA polymerase II holoenzyme	nucleus	none
RPA49	YNL248C		3	no				RNA Polymerase A: RNA polymerase I subunit A49	nucleus, nucleolus	POLR1E	2e-14
RPB9 (x2)	YGL070C		3	3	IRS	lge		RNA Polymerase B: RNA polymerase II subunit B12.6; contacts DNA; mutations affect transcription start site; involved in telomere maintenance	nucleus	POLR2I	6e-25
RPL12A	YEL054C		2	no				Ribosomal Protein of the Large subunit: Protein component of the large (60S) ribosomal subunit, nearly identical to Rpl12Bp; rpl12a rpl12b double mutant exhibits slow growth and slow translation; has similarity to E. coli L11 and rat L12 ribosomal proteins	cytosolic large ribosomal subunit	RPL12	4e-64
RPL13B (x2)	YMR142C	yes	3	no				Ribosomal Protein of the Large subunit: Protein component of the large (60S) ribosomal subunit, nearly identical to Rpl13Ap; not essential for viability; has similarity to rat L13 ribosomal protein	cytosolic large ribosomal subunit	RPL13	1e-45
RPL20B	YOR312C		3	no				Ribosomal Protein of the Large subunit: Protein component of the large (60S) ribosomal subunit, nearly identical to Rpl20Ap and has similarity to rat L18a ribosomal protein	cytosolic large ribosomal subunit	RPL18A	1e-48
RPL27A (x2)	YHR010W		3	no			yes	Ribosomal Protein of the Large subunit:	cytosolic large ribosomal subunit	RPL27	1e-41
RPL35A	YDL191W		3	no		wee	yes	Ribosomal Protein of the Large subunit:	cytosolic large ribosomal subunit	RPL35	1e-29
RPL39 (x2)	YJL189W		2	no		lge		Ribosomal Protein of the Large subunit:	cytosolic large ribosomal subunit	LOC100133222	3e-15
RPL43A	YPR043W		1	no		lge	yes	Ribosomal Protein of the Large subunit:	cytosolic large ribosomal subunit	RPL37A	3e-31
RPL43A (OPI11)	YPR044C		3	no		lge		OverProducer of Inositol: Dubious open reading frame unlikely to encode a protein, based on available experimental and comparative sequence data; partially overlaps verified gene RPL43A/YPR043W; deletion confers sensitivity to GSAO	unknown	none
RPP1A	YDL081C		2	no				Ribosomal Protein P1 Alpha: Ribosomal stalk protein P1 alpha, involved in the interaction between translational elongation factors and the ribosome; accumulation of P1 in the cytoplasm is regulated by phosphorylation and interaction with the P2 stalk component	cytosolic large ribosomal subunit	RPLP1	3e-17
RPS10A	YOR293W		3	no		wee		Ribosomal Protein of the Small subunit: Protein component of the small (40S) ribosomal subunit; nearly identical to Rps10Bp and has similarity to rat ribosomal protein S10	cytosolic small ribosomal subuni	RPS10	8e-27
RPS11B	YBR048W		1	no			yes	Ribosomal Protein of the Small subunit: Protein component of the small (40S) ribosomal subunit; identical to Rps11Ap and has similarity to E. coli S17 and rat S11 ribosomal proteins	cytosolic small ribosomal subunit	RPS11	2e-54
RPS4A	YJR145C		1	no			yes	Ribosomal Protein of the Small subunit: Protein component of the small (40S) ribosomal subunit; mutation affects 20S pre-rRNA processing; identical to Rps4Bp and has similarity to rat S4 ribosomal protein	cytosolic small ribosomal subunit	RPS4X	3e-111
RRN10	YBL025W		3	2				Regulation of RNA polymerase I:	nucleus, nucleolus	none
RSA1	YPL193W		3	no	IRS		yes	RiboSome Assembly: Protein involved in the assembly of 60S ribosomal subunits; functionally interacts with Dbp6p; functions in a late nucleoplasmic step of the assembly	nucleoplasm	AKAP9	0.003
RTG1	YOL067C		3	no				ReTroGrade regulation: Transcription factor (bHLH) involved in interorganelle communication between mitochondria, peroxisomes, and nucleus	cytoplasm, nucleus	none
RTS1	YOR014W		2	3		lge	yes	ROX Three Suppressor: B-type regulatory subunit of protein phosphatase 2A (PP2A); homolog of the mammalian B' subunit of PP2A	cellular bud neck, cytoplasm, nucleus	PPP2R5D	1e-148
RTT109	YLL002W	yes	2	2	IRS	lge	yes	Regulator of Ty1 Transposition: Histone acetyltransferase critical for cell survival in the presence of DNA damage during S phase, acetylates H3-K56; plays a role in regulation of Ty1 transposition	nucleus	none
SAC1	YKL212w		1	no		wee	yes	Suppressor of ACtin: Phosphatidylinositol (PI) phosphatase, involved in hydrolysis of PI 3-phosphate, PI 4-phosphate and PI 3,5-bisphosphate to PI; membrane protein localizes to ER and Golgi; involved in protein trafficking, secretion and inositol metabolism	ER, golgi, mitochondrion	SACM1L	1e-95
SAC3	YDR159W		2	no		lge	yes	Suppressor of ACtin: Nuclear pore-associated protein, forms a complex with Thp1p that is involved in transcription and in mRNA export from the nucleus	nuclear pore	MCM3AP	4e-36
SAC7	YDR389W	yes	3	2				Suppressor of ACtin: GTPase activating protein (GAP) for Rho1p, involved in signaling to the actin cytoskeleton, null mutations suppress tor2 mutations and temperature sensitive mutations in actin; potential Cdc28p substrate	intracellular	ARHGAP6	8e-11
SAT4	YCR008W		2	no			yes	SAlt Tolerance: Ser/Thr protein kinase involved in salt tolerance; funtions in regulation of Trk1p-Trk2p potassium transporter; partially redundant with Hal5p; has similarity to Npr1p	unknown	CHEK1	2e-32
SER1	YOR184W	yes	3	no				SERine requiring: 3-phosphoserine aminotransferase, catalyzes the formation of phosphoserine from 3-phosphohydroxypyruvate, required for serine and glycine biosynthesis; regulated by the general control of amino acid biosynthesis mediated by Gcn4p	cytoplasm	PSAT1	1e-72
SER2	YGR208W	yes	1	2				SERine requiring: Phosphoserine phosphatase of the phosphoglycerate pathway, involved in serine and glycine biosynthesis, expression is regulated by the available nitrogen sourc	cytoplasm, nucleus	PSPH	2e-14
SHP1 (x2)	YBL058W		3	3		lge		Suppressor of High-copy PP1: UBX (ubiquitin regulatory X) domain-containing protein that regulates Glc7p phosphatase activity and interacts with Cdc48p; interacts with ubiquitylated proteins in vivo and is required for degradation of a ubiquitylated model substrate	cytoplasm, nucleus	NSFL1C	3e-36
SIN3	YOL004W		3	no		lge	yes	Switch INdependent: Component of the Sin3p-Rpd3p histone deacetylase complex, involved in transcriptional repression and activation of diverse processes, including mating-type switching and meiosis; involved in the maintenance of chromosomal integrit	mitochondrion	SIN3A	3e-96
SIN4	YNL236W		2	no			yes	Switch Independent: Subunit of the RNA polymerase II mediator complex; associates with core polymerase subunits to form the RNA polymerase II holoenzyme; contributes to both postive and negative transcriptional regulation; dispensible for basal transcription	nucleus	none
SIR2 (OVLP)	YDL041W		1	no	IRS			ORF, Dubious: partially overlaps SIR2	unknown	none
SLM4	YBR077C		1	1				Synthetic Lethal with Mss4: Component of the EGO complex, which is involved in the regulation of microautophagy, and of the GSE complex, which is required for proper sorting of amino acid permease Gap1p; gene exhibits synthetic genetic interaction with MSS4	cytoplasm, vacuole membrane	none
SLX8	YER116C		3	no	IRS	lge	yes	Synthetic Lethal of unknown (X) function: Subunit of the Slx5-Slx8 substrate-specific ubiquitin ligase complex; stimulated by prior attachment of SUMO to the substrate	nucleus, cytoplasm	RNF10	1e-07
SNF2	YOR290C	yes	3	3			yes	Sucrose NonFermenting: Catalytic subunit of the SWI/SNF chromatin remodeling complex involved in transcriptional regulation; contains DNA-stimulated ATPase activity; functions interdependently in transcriptional activation with Snf5p and Snf6p	nucleus	SMARCA2	0
SNF5 (x2)	YBR289W		3	3		lge	yes	Sucrose NonFermenting: Subunit of the SWI/SNF chromatin remodeling complex involved in transcriptional regulation; functions interdependently in transcriptional activation with Snf2p and Snf6p	nucleus	MLL2	4e-36
SNF6	YHL025W		2	3			yes	Sucrose NonFermenting: Subunit of the SWI/SNF chromatin remodeling complex involved in transcriptional regulation; functions interdependently in transcriptional activation with Snf2p and Snf5	nucleus	none
SOD1	YJR104C	yes	3	1			yes	SuperOxide Dismutase: Cytosolic superoxide dismutase; some mutations are analogous to those that cause ALS (amyotrophic lateral sclerosis) in humans	mitochondrion, cytosol	SOD1	3e-43
SPT5 (OVLP)	YML009C-A		2	no	IRS			ORF, Dubious: partially overlaps SPT5	unknown	none
SPT7	YBR081C		2	3		lge		SuPpressor of Ty: Subunit of the SAGA transcriptional regulatory complex, involved in proper assembly of the complex; also present as a C-terminally truncated form in the SLIK/SALSA transcriptional regulatory complex	nucleus, mitochondrion	BAZ1A	3e-12
SSZ1	YHR064C	yes	2	no		wee	yes	Hsp70 protein that interacts with Zuo1p (a DnaJ homolog) to form a ribosome-associated complex that binds the ribosome via the Zuo1p subunit; also involved in pleiotropic drug resistance via sequential activation of PDR1 and PDR5; binds ATP	cytoplasm	HSPA8	3e-57
SUV3	YPL029W		3	3		wee	yes	SUppressor of Var1: ATP-dependent RNA helicase, component of the mitochondrial degradosome along with the RNase Dss1p; the degradosome associates with the ribosome and mediates turnover of aberrant or unprocessed RNAs	mitochondrion	SUPV3L1	8e-80
SWI3	YJL176C	yes	3	3			yes	SWItching deficient: Subunit of the SWI/SNF chromatin remodeling complex, which regulates transcription by remodeling chromosomes; required for transcription of many genes, including ADH1, ADH2, GAL1, HO, INO1 and SUC2	nucleus	SMARCC2	2e-63
SWI3 (OVLP)	YJL175W		2	3			yes	Dubious ORF: Dubious open reading frame unlikely to encode a functional protein; deletion confers resistance to cisplatin, hypersensitivity to 5-fluorouracil, and growth defect at high pH with high calcium; overlaps gene for SWI3 transcription factor	unknown	none
SWI6	YLR182W	yes	1	3		lge	yes	SWItching deficient: Transcription cofactor, forms complexes with DNA-binding proteins Swi4p and Mbp1p to regulate transcription at the G1/S transition; involved in meiotic gene expression; localization regulated by phosphorylation; potential Cdc28p substrate	cytoplasm, nucleus	AKAP9	5e-06
TAF14	YPL129W		3	no				TATA binding protein-Associated Factor: Subunit of TFIID, TFIIF, INO80, SWI/SNF, and NuA3 complexes, involved in RNA polymerase II transcription initiation and in chromatin modification; contains a YEATS domain	nucleus	MLLT3	3e-10
TAT1	YBR069C	yes	3	1			yes	Tyrosine and tryptophan Amino acid Transporter: Amino acid transport protein for valine, leucine, isoleucine, and tyrosine, low-affinity tryptophan and histidine transporter; overexpression confers FK506 and FTY720 resistance	plasma membrane	SLC7A14	1e-13
TCM62	YBR044C		1	no				TriChoderMin resistance: Protein involved in the assembly of the mitochondrial succinate dehydrogenase complex; putative chaperone	mitochondrion	HSPD1	8e-14
TCO89	YPL180W	yes	3	2		lge		Tor Complex One: Subunit of TORC1 (Tor1p or Tor2p-Kog1p-Lst8p-Tco89p), a complex that regulates growth in response to nutrient availability; cooperates with Ssd1p in the maintenance of cellular integrity; deletion strains are hypersensitive to rapamycin	plasma membrane, vacuolar membrane	DSPP	4e-18
TFP3	YPL234C	yes	3	no				TriFluoPerazine resistance: Vacuolar ATPase V0 domain subunit c', involved in proton transport activity; hydrophobic integral membrane protein (proteolipid) containing four transmembrane segments; N and C termini are in the vacuolar lumen	ER	ATP6V0C	5e-46
THP1	YOL072W		3	no				Tho2/Hpr1 Phenotype:Nuclear pore-associated protein, forms a complex with Sac3p that is involved in transcription and in mRNA export from the nucleus; contains a PAM domain implicated in protein-protein binding	nuclear pore	PCID2	6e-11
TOP3 (x2)	YLR234W	yes	2	3	IRS		yes	TOPoisomerase: DNA Topoisomerase III, conserved protein that functions in a complex with Sgs1p and Rmi1p to relax single-stranded negatively-supercoiled DNA preferentially, involved in telomere stability and regulation of mitotic recombination	nucleus	TOP3A	2e-124
TOP3 (OVLP, x2)	YLR235C		3	3				ORF, Dubious: partially overlaps TOP3	unknown	none
TPS1	YBR126C		3	1	IRS		yes	Trehalose-6-Phosphate Synthase: Synthase subunit of trehalose-6-phosphate synthase/phosphatase complex, which synthesizes the storage carbohydrate trehalose; also found in a monomeric form; expression is induced by the stress response and repressed by the Ras-cAMP pathway	cytoplasm	none
TRK1	YJL129C		2	no				TRansport of potassium (K): Component of the Trk1p-Trk2p potassium transport system; 180 kDa high affinity potassium transporter; phosphorylated in vivo and interacts physically with the phosphatase Ppz1p, suggesting Trk1p acitivy is regulated by phosphorylation	membrane raft	DSPP	3e-12
TSR2 (x2)	YLR435W		2	2	IRS			Twenty S rRNA accumulation: Protein with a potential role in pre-rRNA processing	cytoplasm, nucleus	TSR2	4e-13
TUP1 (x2)	YCR084C		3	3	IRS			Thymidine UPtake: General repressor of transcription, forms complex with Cyc8p, involved in the establishment of repressive chromatin structure through interactions with histones H3 and H4, appears to enhance expression of some genes	nucleus	WDR5	5e-30
UAF30	YOR295W	yes	3	no		wee	yes	Upstream Activation Factor subunit: Subunit of UAF (upstream activation factor), which is an RNA polymerase I specific transcription stimulatory factor composed of Uaf30p, Rrn5p, Rrn9p, Rrn10p, histones H3 and H4; deletion decreases cellular growth rate	nucleus, nucleolus	SMARCD1	1e-06
VAN1	YML115C		2	3			yes	VANadate resistance protein: Component of the mannan polymerase I, which contains Van1p and Mnn9p and is involved in the first steps of mannan synthesis; mutants are vanadate-resistant	vacuole, golgi	none
VMA10	YHR039C-B		2	2			yes	Vacuolar Membrane ATPase: Vacuolar H+ ATPase subunit G of the catalytic (V1) sector, involved in vacuolar acidification	vacuolar membrane	ATP6V1G1	1e-14
VMA13	YPR036W		3	no			yes	Vacuolar Membrane ATPase: Subunit H of the eight-subunit V1 peripheral membrane domain of the vacuolar H+-ATPase (V-ATPase), an electrogenic proton pump found throughout the endomembrane system; serves as an activator or a structural stabilizer of the V-ATPase	vacuolar membrane	ATP6V1H	4e-29
VMA2 (x2)	YBR127C		2	3			yes	Vacuolar Membrane ATPase: Subunit B of the eight-subunit V1 peripheral membrane domain of the vacuolar H+-ATPase (V-ATPase), an electrogenic proton pump found throughout the endomembrane system; contains nucleotide binding sites; also detected in the cytoplasm	vacuolar membrane	ATP6V1B2	1e-144
VMA4 (x2)	YOR332W		3	2			yes	Vacuolar Membrane ATPase: Subunit E of the eight-subunit V1 peripheral membrane domain of the vacuolar H+-ATPase (V-ATPase), an electrogenic proton pump found throughout the endomembrane system; required for the V1 domain to assemble onto the vacuolar membrane	vacuolar membrane	ATP6V1E1	2e-33
VMA4 (OVLP, x2)	YOR331C		3	2				ORF Dubious: partially overlaps VMA4	unknown	none
VMA5	YKL080W		2	3				Vacuolar Membrane ATPase: Subunit C of the eight-subunit V1 peripheral membrane domain of vacuolar H+-ATPase (V-ATPase), an electrogenic proton pump found throughout the endomembrane system; required for the V1 domain to assemble onto the vacuolar membrane	vacuolar membrane	ATP6V1C1	7e-60
VMA6	YLR447C		2	no				Vacuolar Membrane ATPase: Subunit d of the five-subunit V0 integral membrane domain of vacuolar H+-ATPase (V-ATPase), an electrogenic proton pump found in the endomembrane system; stabilizes VO subunits; required for V1 domain assembly on the vacuolar membrane	vacuolar membrane	ATP6V0D1	6e-84
VMA7	YGR020C		3	2	IRS			Vacuolar Membrane ATPase: Subunit F of the eight-subunit V1 peripheral membrane domain of vacuolar H+-ATPase (V-ATPase), an electrogenic proton pump found throughout the endomembrane system; required for the V1 domain to assemble onto the vacuolar membrane	vacuolar membrane	ATP6V1F	3e-25
VMA9 (OVLP)	YCL007C		3	no				ORF, Dubious: partially overlaps VMA9	unknown	none
VPH2	YKL119C	yes	2	no	IRS			Vacuolar pH: Integral membrane protein required for vacuolar H+-ATPase (V-ATPase) function, although not an actual component of the V-ATPase complex; functions in the assembly of the V-ATPase; localized to the endoplasmic reticulum (ER)	ER membrane	none
VPH2 (OVLP)	YKL118W		2	no	IRS			ORF, Dubious: partially overlaps VPH2	unknown	none
VPS34 (x2)	YLR240W		3	3		lge		Vacuolar Protein Sorting: Phosphatidylinositol 3-kinase responsible for the synthesis of phosphatidylinositol 3-phosphate; forms membrane-associated signal transduction complex with Vps15p to regulate protein sorting; activated by the GTP-bound form of Gpa1p	membrane fraction	PIK3C3	9e-151
VPS64	YDR200C		3	2				Vacuolar Protein Sorting: Cytoplasmic protein required for cytoplasm to vacuole targeting of proteins; forms a complex with Far3p, Far7p, Far10p, and Far11p that is involved in pheromone-induced cell cycle arrest; also localized to the endoplasmic reticulum membrane	ER membrane, cytoplasm	SLMAP	6e-09
XRS2	YDR369C	yes	3	2	IRS			X-Ray Sensitive: Protein required for DNA repair; component of the Mre11 complex, which is involved in double strand breaks, meiotic recombination, telomere maintenance, and checkpoint signaling	nucleus	DSPP	2e-05
YAF9	YNL107W		2	2	IRS		yes	Yeast homolog of the human leukemogenic protein AF9: Subunit of both the NuA4 histone H4 acetyltransferase complex and the SWR1 complex, may function to antagonize silencing near telomeres; interacts directly with Swc4p, has homology to human leukemogenic protein AF9, contains a YEATS domain	cytoplasm, nucleus	YEATS4	4e-32
YAR1	YPL239W		3	no			yes	Yeast Ankyrin Repeat: Cytoplasmic ankyrin-repeat containing protein of unknown function, proposed to link the processes of 40S ribosomal subunit biogenesis and adaptation to osmotic and oxidative stress; expression repressed by heat shock	cytoplasm	FEM1C	1e-07
YDJ1	YNL064C	yes	2	3	IRS	lge	yes	Yeast dnaJ: Protein chaperone involved in regulation of the HSP90 and HSP70 functions; involved in protein translocation across membranes; member of the DnaJ family.	cytoplasm	Hsp40	7e-106
SUM:		34	209	106	57	74	71			164
%			100	50.7	27.3	35.4	34			78.5
